# Supplementary material
Source: PubMed Central journal article supplement (PMC6684203)
Supplement: NIHMS1043244-supplement-1.pdf [file NIHMS1043244-supplement-1.pdf]

Supplementary Table 1. Characteristics of individuals who reported a history of NSSI

| Forms of NSSI (N, %)                                                      | Full Sample | SI (90, 25.07%) | SP (33, 9.19%) | SA (51, 14.21%) |
|---------------------------------------------------------------------------|-------------|-----------------|----------------|-----------------|
| Cut wrist, arms, or other area(s) of body                                 | 184 (51.30) | 57 (63.30)      | 22 (66.70)     | 41 (80.40)      |
| Burned self with cigarette                                                | 29 (8.10)   | 8 (8.90)        | 5 (15.20)      | 3 (5.90)        |
| Burned self with a lighter or match                                       | 37 (10.30)  | 9 (10.00)       | 4 (12.10)      | 6 (11.80)       |
| Carved words into skin                                                    | 44 (12.30)  | 19 (21.10)      | 9 (27.30)      | 15 (29.40)      |
| Carved pictures, designs, or other marks into skin                        | 31 (8.60)   | 7 (7.80)        | 4 (12.10)      | 5 (9.80)        |
| Severely scratched self, to the extent that scarring or bleeding occurred | 92 (25.60)  | 27 (30.00)      | 10 (30.30)     | 15 (29.40)      |
| Bit self, to the extent that skin was broken                              | 18 (5.00)   | 6 (6.70)        | 3 (9.10)       | 2 (3.90)        |
| Rubbed sandpaper on body                                                  | 13 (3.60)   | 1 (1.10)        | 0 (0.00)       | 0 (0.00)        |
| Dripped acid onto skin                                                    | 1 (0.30)    | 0 (0.00)        | 0 (0.00)       | 0 (0.00)        |
| Used bleach, Comet, or oven cleaner to scrub skin                         | 0 (0.00)    | 0 (0.00)        | 0 (0.00)       | 0 (0.00)        |
| Stuck sharp objects (needles, pins, staples, etc.) into skin              | 52 (14.50)  | 13 (14.40)      | 5 (15.20)      | 5 (9.80)        |
| Rubbed glass into skin                                                    | 4 (1.10)    | 2 (2.20)        | 0 (0.00)       | 1 (2.00)        |
| Broken own bones                                                          | 1 (0.30)    | 0 (0.00)        | 0 (0.00)       | 0 (0.00)        |
| Banged head, to the extent that a bruise appeared                         | 39 (10.90)  | 13 (14.40)      | 6 (18.20)      | 7 (13.70)       |
| Punched self, to the extent that a bruise appeared                        | 37 (10.30)  | 15 (16.70)      | 8 (24.20)      | 7 (13.70)       |
| Prevented wounds from healing                                             | 40 (11.10)  | 13 (14.40)      | 5 (15.20)      | 4 (7.80)        |
| <b>NSSI Locations (N, %)</b>                                              |             |                 |                |                 |
| Arm/Wrist                                                                 | 222 (61.80) | 67 (74.40)      | 25 (75.80)     | 42 (82.40)      |
| Scalp                                                                     | 29 (8.10)   | 10 (11.10)      | 5 (15.20)      | 1 (2.00)        |
| Face                                                                      | 47 (13.10)  | 16 (17.80)      | 5 (15.20)      | 3 (5.90)        |
| Neck/Throat                                                               | 26 (7.20)   | 9 (10.00)       | 3 (9.10)       | 7 (13.70)       |

|                        |             |            |            |            |
|------------------------|-------------|------------|------------|------------|
| Chest                  | 28 (7.80)   | 11 (12.20) | 2 (6.10)   | 4 (7.80)   |
| Breasts                | 11 (3.10)   | 1 (1.10)   | 0 (0.00)   | 0 (0.00)   |
| Back                   | 4 (1.10)    | 0 (0.00)   | 0 (0.00)   | 0 (0.00)   |
| Shoulders              | 22 (6.10)   | 6 (6.70)   | 3 (9.10)   | 4 (7.80)   |
| Abdomen                | 61 (17.00)  | 21 (23.30) | 7 (21.20)  | 18 (35.3)  |
| Hips                   | 57 (15.90)  | 14 (15.60) | 8 (24.20)  | 16 (31.40) |
| Buttocks               | 8 (2.20)    | 2 (2.20)   | 2 (6.10)   | 3 (5.90)   |
| Genitals               | 5 (1.40)    | 3 (3.30)   | 0 (0.00)   | 1 (2.00)   |
| Upper arm/Elbow        | 63 (17.50)  | 24 (26.70) | 12 (36.40) | 15 (29.40) |
| Hands/Knuckles/Fingers | 92 (25.60)  | 29 (32.20) | 8 (24.20)  | 10 (19.60) |
| Thigh                  | 123 (34.30) | 44 (48.90) | 17 (51.50) | 25 (49.00) |
| Knee                   | 26 (7.20)   | 8 (8.90)   | 5 (15.20)  | 4 (7.80)   |
| Lower leg/Ankle        | 42 (11.70)  | 11 (12.20) | 5 (15.20)  | 8 (15.70)  |
| Foot/Toes              | 14 (3.90)   | 4 (4.40)   | 2 (6.10)   | 6 (11.80)  |

Subjective Experience of NSSI (N, %)

|                                                                                                                        |                                |                               |                              |                               |
|------------------------------------------------------------------------------------------------------------------------|--------------------------------|-------------------------------|------------------------------|-------------------------------|
| <i>Do you experience physical pain during self-harm?</i> (N, %)                                                        | No (90, 25.10)                 | No (13, 14.40)                | No (5, 15.20)                | No (8, 15.70)                 |
|                                                                                                                        | Sometimes (124, 34.50)         | Sometimes (43, 47.80)         | Sometimes (17, 51.50)        | Sometimes (26, 51.00)         |
|                                                                                                                        | Yes (145, 40.40)               | Yes (34, 37.80)               | Yes (11, 33.30)              | Yes (17, 33.30)               |
| <i>When you self-harm, are you alone?</i> (N, %)                                                                       | No (77, 21.40)                 | No (7, 7.80)                  | No (3, 9.10)                 | No (5, 9.80)                  |
|                                                                                                                        | Sometimes (41, 11.40)          | Sometimes (12, 13.30)         | Sometimes (3, 9.10)          | Sometimes (5, 9.80)           |
|                                                                                                                        | Yes (241, 67.10)               | Yes (71, 78.90)               | Yes (27, 81.80)              | Yes (41, 80.40)               |
| <i>Typically, how much time elapses from the time you have the urge to self-harm until you act on the urge?</i> (N, %) | < 1 hour (189, 52.60)          | < 1 hour (44, 48.90)          | < 1 hour (16, 48.50)         | < 1 hour (29, 56.90)          |
|                                                                                                                        | 1-3 hours (51, 14.20)          | 1-3 hours (23, 25.60)         | 1-3 hours (7, 21.20)         | 1-3 hours (8, 15.70)          |
|                                                                                                                        | 3-6 hours (5, 1.40)            | 3-6 hours (1, 1.10)           | 3-6 hours (0, 0.00)          | 3-6 hours (0, 0.00)           |
|                                                                                                                        | 6-12 hours (6, 1.70)           | 6-12 hours (1, 1.10)          | 6-12 hours (1, 3.00)         | 6-12 hours (1, 2.00)          |
|                                                                                                                        | 12-24 hours (9, 2.50)          | 12-24 hours (3, 3.30)         | 12-24 hours (0, 0.00)        | 12-24 hours (3, 5.90)         |
|                                                                                                                        | > 1 day (99, 27.60)            | > 1 day (18, 20.00)           | > 1 day (9, 27.30)           | > 1 day (10, 19.60)           |
| <i>Do/did you want to stop self-harming?</i> (N, %)                                                                    | No (46, 12.80)                 | No (13, 14.40)                | No (10, 30.30)               | No (5, 9.80)                  |
|                                                                                                                        | Yes (313, 87.20)               | Yes (77, 85.60)               | Yes (23, 69.70)              | Yes (46, 90.20)               |
| <i>If you were feeling bad in the future, how likely would you</i>                                                     | Not at all likely (239, 66.60) | Not at all likely (35, 38.90) | Not at all likely (8, 24.20) | Not at all likely (26, 51.00) |

|                                                                                                  |                                                                                                          |                                                                                                          |                                                                                                         |                                                                                                          |
|--------------------------------------------------------------------------------------------------|----------------------------------------------------------------------------------------------------------|----------------------------------------------------------------------------------------------------------|---------------------------------------------------------------------------------------------------------|----------------------------------------------------------------------------------------------------------|
| <i>hurt yourself intentionally (without intending to kill yourself) as a way to cope?</i> (N, %) | Less likely (68, 18.90)<br>Somewhat likely (37, 10.30)<br>More likely (7, 1.90)<br>Very likely (8, 2.20) | Less likely (28, 31.10)<br>Somewhat likely (21, 23.30)<br>More likely (4, 4.40)<br>Very likely (2, 2.20) | Less likely (9, 27.30)<br>Somewhat likely (11, 33.30)<br>More likely (3, 9.10)<br>Very likely (2, 6.10) | Less likely (12, 23.50)<br>Somewhat likely (11, 21.60)<br>More likely (2, 3.90)<br>Very likely (0, 0.00) |
| <b>Functions of NSSI (Mean, SD)</b>                                                              |                                                                                                          |                                                                                                          |                                                                                                         |                                                                                                          |
| Affect Regulation                                                                                | 2.89 (2.24)                                                                                              | 3.89 (1.96)                                                                                              | 4.00 (2.17)                                                                                             | 4.08 (1.83)                                                                                              |
| Anti-Suicide                                                                                     | 1.03 (1.70)                                                                                              | 2.07 (1.91)                                                                                              | 2.76 (1.94)                                                                                             | 2.33 (1.96)                                                                                              |
| Interpersonal Boundaries                                                                         | 0.63 (1.22)                                                                                              | 0.88 (1.39)                                                                                              | 0.73 (1.31)                                                                                             | 0.76 (1.24)                                                                                              |
| Self-Punishment                                                                                  | 2.31 (2.25)                                                                                              | 3.38 (2.18)                                                                                              | 4.06 (2.46)                                                                                             | 3.39 (2.27)                                                                                              |
| Self-Care                                                                                        | 0.69 (1.18)                                                                                              | 1.13 (1.38)                                                                                              | 1.24 (1.46)                                                                                             | 0.94 (1.17)                                                                                              |
| Anti-Dissociation                                                                                | 1.55 (1.85)                                                                                              | 2.54 (2.03)                                                                                              | 2.33 (2.03)                                                                                             | 2.88 (2.06)                                                                                              |
| Sensation-Seeking                                                                                | 0.57 (1.02)                                                                                              | 0.68 (1.17)                                                                                              | 0.67 (1.29)                                                                                             | 0.49 (0.78)                                                                                              |
| Peer-Bonding                                                                                     | 0.20 (0.65)                                                                                              | 0.19 (0.56)                                                                                              | 0.03 (0.17)                                                                                             | 0.04 (0.28)                                                                                              |
| Interpersonal Influence                                                                          | 0.60 (1.17)                                                                                              | 0.71 (1.14)                                                                                              | 0.45 (0.97)                                                                                             | 0.90 (1.75)                                                                                              |
| Toughness                                                                                        | 0.86 (1.23)                                                                                              | 1.10 (1.25)                                                                                              | 0.67 (0.85)                                                                                             | 0.63 (1.00)                                                                                              |
| Marking Distress                                                                                 | 1.42 (1.79)                                                                                              | 2.17 (1.96)                                                                                              | 2.12 (2.13)                                                                                             | 2.00 (1.84)                                                                                              |
| Revenge                                                                                          | 0.35 (0.93)                                                                                              | 0.38 (0.82)                                                                                              | 0.15 (0.44)                                                                                             | 0.53 (1.21)                                                                                              |
| Autonomy                                                                                         | 0.32 (0.84)                                                                                              | 0.48 (1.08)                                                                                              | 0.30 (0.81)                                                                                             | 0.31 (0.95)                                                                                              |
| <b>NSSI Characteristics</b>                                                                      |                                                                                                          |                                                                                                          |                                                                                                         |                                                                                                          |
| Age of onset in years, Mean (SD)                                                                 | 13.85 (8.83)                                                                                             | 13.26 (4.14)                                                                                             | 13.85 (3.99)                                                                                            | 13.78 (4.79)                                                                                             |
| Received medical attention, N (%)                                                                | 25 (7.00)                                                                                                | 10 (11.10)                                                                                               | 5 (15.20)                                                                                               | 13 (25.50)                                                                                               |
| Scar presence, N (%)                                                                             | 146 (40.70)                                                                                              | 49 (54.40)                                                                                               | 21 (63.60)                                                                                              | 31 (60.80)                                                                                               |
| Scar Number, N (%)                                                                               |                                                                                                          |                                                                                                          |                                                                                                         |                                                                                                          |
| 0 (0)                                                                                            | 213 (59.30)                                                                                              | 41 (45.60)                                                                                               | 12 (36.40)                                                                                              | 20 (39.20)                                                                                               |
| 1 (1)                                                                                            | 18 (5.00)                                                                                                | 0 (0.00)                                                                                                 | 0 (0.00)                                                                                                | 1 (2.00)                                                                                                 |
| 2 (2-5)                                                                                          | 59 (16.40)                                                                                               | 15 (16.70)                                                                                               | 3 (9.10)                                                                                                | 6 (11.80)                                                                                                |
| 3 (6-20)                                                                                         | 40 (11.10)                                                                                               | 18 (20.00)                                                                                               | 9 (27.30)                                                                                               | 9 (17.60)                                                                                                |
| 4 (21-50)                                                                                        | 16 (4.50)                                                                                                | 7 (7.80)                                                                                                 | 4 (12.10)                                                                                               | 8 (15.70)                                                                                                |
| 5 (50+)                                                                                          | 10 (2.80)                                                                                                | 6 (6.70)                                                                                                 | 5 (15.20)                                                                                               | 6 (11.80)                                                                                                |
| Number of methods, N (%)                                                                         |                                                                                                          |                                                                                                          |                                                                                                         |                                                                                                          |
| 1                                                                                                | 196 (54.60)                                                                                              | 37 (41.10)                                                                                               | 8 (24.20)                                                                                               | 19 (37.30)                                                                                               |
| 2                                                                                                | 86 (24.00)                                                                                               | 24 (26.70)                                                                                               | 12 (36.40)                                                                                              | 16 (31.40)                                                                                               |

|                              |             |            |            |            |
|------------------------------|-------------|------------|------------|------------|
| 3                            | 39 (10.90)  | 11 (12.20) | 5 (15.20)  | 5 (9.80)   |
| 4                            | 18 (5.00)   | 10 (11.10) | 4 (12.10)  | 4 (7.80)   |
| 5                            | 10 (2.80)   | 2 (2.20)   | 1 (3.00)   | 5 (9.80)   |
| 6                            | 7 (1.90)    | 5 (5.60)   | 2 (6.10)   | 2 (3.90)   |
| 7                            | 3 (0.80)    | 1 (1.10)   | 1 (3.00)   | 0 (0.00)   |
| Frequency of NSSI, past year |             |            |            |            |
| 0 (0)                        | 200 (55.70) | 34 (37.80) | 10 (30.30) | 25 (49.00) |
| 1 (1)                        | 38 (10.60)  | 11 (12.20) | 3 (9.10)   | 5 (9.80)   |
| 2 (2-5)                      | 62 (17.30)  | 24 (26.70) | 12 (36.40) | 11 (21.60) |
| 3 (6-20)                     | 38 (10.60)  | 12 (13.30) | 4 (12.10)  | 9 (17.60)  |
| 4 (21-50)                    | 9 (2.50)    | 4 (4.40)   | 3 (9.10)   | 1 (2.00)   |
| 5 (50+)                      | 12 (3.30)   | 5 (5.60)   | 1 (3.00)   | 0 (0.00)   |
| Frequency of NSSI, Lifetime  |             |            |            |            |
| 1 (1)                        | 56 (15.60)  | 3 (3.30)   | 1 (3.00)   | 2 (3.90)   |
| 2 (2-5)                      | 106 (29.50) | 24 (26.70) | 9 (27.30)  | 10 (19.60) |
| 3 (6-20)                     | 87 (24.20)  | 21 (23.30) | 5 (15.20)  | 14 (27.50) |
| 4 (21-50)                    | 55 (15.30)  | 21 (23.30) | 7 (21.20)  | 15 (29.40) |
| 5 (50+)                      | 55 (15.30)  | 21 (23.30) | 11 (33.30) | 10 (19.60) |

Note.  $N = 359$ . Age of onset missing for 11, 3, 0, and 1 participants, respectively, in each group. NSSI Method – “Used bleach, Comet, or oven cleaner to scrub skin” was not included in analyses due to zero participants endorsing this behavior.
